# Supplementary material for: Flower visitors of Streptocarpus teitensis: implications for conservation of a critically endangered African violet species in Kenya
Source: PeerJ journal article supplement (doi:10.7717/peerj.10473), 2021-01-26
Supplement: Appendix_5___Species_strength.pdf [file Appendix_5___Species_strength.pdf]

Sup 5 (a): Species strength of *S. teitensis* pollinators visiting other wild flowers

| <b>S/N</b> | <b>Species</b>              | <b>Species strength</b> |
|------------|-----------------------------|-------------------------|
| 1.         | <i>Anthophora conspicua</i> | 6.88                    |
| 2.         | <i>Anthophora piligera</i>  | 0.50                    |
| 3.         | <i>Anthophora torrida</i>   | 2.04                    |
| 4.         | <i>Apis mellifera</i>       | 0.58                    |
| 5.         | <i>Cathimeris sp</i>        | 0.36                    |
| 6.         | <i>Ceratina sp</i>          | 0.75                    |
| 7.         | <i>Congomochtherus sp</i>   | 0.92                    |
| 8.         | <i>Eumenes sp</i>           | 0.36                    |
| 9.         | <i>Geron sp</i>             | 0.45                    |
| 10.        | <i>Helina coniformis</i>    | 0.89                    |
| 11.        | <i>Liris sp</i>             | 0.61                    |
| 12.        | <i>Megachile cincta</i>     | 0.68                    |
| 13.        | <i>Megachile felina</i>     | 0.50                    |
| 14.        | <i>Megachile sp</i>         | 0.58                    |
| 15.        | <i>Phytomia incisa</i>      | 0.58                    |
| 16.        | <i>Rhingia trivittata</i>   | 1.62                    |
| 17.        | <i>Synagris analis</i>      | 1.65                    |
| 18.        | <i>Xylocopa flavorufa</i>   | 0.75                    |
| 19.        | <i>Xylocopa hottentota</i>  | 1.08                    |
| 20.        | <i>Xylocopa nigrita</i>     | 0.20                    |

Sup 5 (b): Species strength of top four *S. teitensis* pollinators visiting other wild flowers

| <b>S/N</b> | <b>Species</b>              | <b>Species strength</b> |
|------------|-----------------------------|-------------------------|
| 1.         | <i>Anthophora conspicua</i> | 10.07                   |
| 2.         | <i>Anthophora torrida</i>   | 3.12                    |
| 3.         | <i>Rhingia trivittata</i>   | 3.7                     |
| 4.         | <i>Synagris analis</i>      | 3.12                    |
