# Supplementary material for: Flower visitors of Streptocarpus teitensis: implications for conservation of a critically endangered African violet species in Kenya
Source: PeerJ. 2021 Jan 26;9:e10473. doi: 10.7717/peerj.10473 (PMC7845525; doi:10.7717/peerj.10473)
Supplement: Supplemental Information 2 — Different insect species and morphospecies observed visiting the flowers of S. teitensis during 30-minute timed visual observations conducted between 27th April and 2nd August 2019 [file peerj-09-10473-s002.xlsx]

## Sheet: Raw data 1_African_violets_flow
Date	Site	Start Time	End time	Sampling point	No. flowers observed	Humidity %	Wind speed km/h	Flower visitor ID	No. Visits
2019-04-27	B	09:15:00	09:45:00	1	3	84	10		0
2019-04-27	B	11:00:00	11:30:00	1	3	84	10		0
2019-04-28	A	10:15:00	10:45:00	1	4	84	8	Anthophora conspicua	2
2019-04-28	A	10:15:00	10:45:00	1	4	84	8	Anthophora conspicua	1
2019-04-28	A	12:00:00	12:30:00	2	1	84	8	Anthophora conspicua	1
2019-04-28	A	13:20:00	13:50:00	3	6	80	8	Anthophora conspicua	6
2019-04-28	A	13:20:00	13:50:00	3	6	80	8	Anthophora conspicua	1
2019-04-28	A	13:20:00	13:50:00	3	6	80	8	Anthophora torrida	1
2019-04-28	A	10:15:00	10:45:00	1	4	84	8	Ceratina sp.	1
2019-04-28	A	13:20:00	13:50:00	3	6	80	8	Congomochtherus sp.	1
2019-04-28	A	12:00:00	12:30:00	2	1	84	8	Unidentified	1
2019-04-28	A	12:00:00	12:30:00	2	1	84	8	Xylocopa flavorufa	3
2019-04-29	A	10:35:00	11:05:00	4	3	81	11	Anthophora acraensis	1
2019-04-29	A	10:35:00	11:05:00	4	3	81	11	Anthophora conspicua	1
2019-04-29	A	11:45:00	12:15:00	5	2	81	11	Anthophora conspicua	1
2019-04-29	A	14:00:00	14:30:00	2	4	81	11	Anthophora conspicua	1
2019-04-29	A	14:00:00	14:30:00	2	4	81	11	Anthophora torrida	1
2019-04-29	A	10:35:00	11:05:00	4	3	81	11	Ceratina sp.	1
2019-04-29	A	14:00:00	14:30:00	2	4	81	11	Ceratina sp.	1
2019-04-29	A	10:35:00	11:05:00	4	3	81	11	Megachile cincta	1
2019-04-29	A	11:45:00	12:15:00	5	2	81	11	Megachile sp.	1
2019-04-29	A	10:35:00	11:05:00	4	3	81	11	Rhingia trivittata	2
2019-04-29	A	10:35:00	11:05:00	4	3	81	11	Xylocopa modesta	1
2019-04-29	A	12:45:00	13:15:00	1	4	81	11		0
2019-04-29	A	15:15:00	16:15:00	3	2	81	11		0
2019-04-30	B	08:30:00	09:00:00	1	2	67	14		0
2019-04-30	B	10:30:00	11:00:00	1	3	67	14		0
2019-05-01	A	11:30:00	12:00:00	2	4	72	10	Anthophora conspicua	1
2019-05-01	A	11:30:00	12:00:00	2	4	72	10	Anthophora piligera	2
2019-05-01	A	11:30:00	12:00:00	2	4	72	10	Cathimeris sp.	7
2019-05-01	A	11:30:00	12:00:00	2	4	72	10	Megachile cincta	2
2019-05-01	A	10:00:00	10:30:00	3	2	72	8		0
2019-05-01	A	14:40:00	15:10:00	1	1	72	8		0
2019-05-02	A	13:30:00	14:00:00	5	6	72	8	Anthophora conspicua	1
2019-05-02	A	13:30:00	14:00:00	5	6	72	8	Anthophora Sp.	1
2019-05-02	A	13:30:00	14:00:00	5	6	72	8	Apis mellifera	9
2019-05-02	A	13:30:00	14:00:00	5	6	72	8	Megachile basalis	1
2019-05-02	A	13:30:00	14:00:00	5	6	72	8	Megachile sp.	3
2019-05-02	A	10:30:00	11:00:00	1	1	72	8		0
2019-05-03	A	13:30:00	14:00:00	4	2	86	8	Anthophora piligera	1
2019-05-03	A	09:30:00	10:00:00	3	2	72	8	Anthophora torrida	4
2019-05-03	A	09:30:00	10:00:00	3	2	72	8	Anthophora torrida	1
2019-05-03	A	09:30:00	10:00:00	3	2	72	8	Apis mellifera	3
2019-05-03	A	09:30:00	10:00:00	3	2	72	8	Ceratina sp.	1
2019-05-03	A	09:30:00	10:00:00	3	2	72	8	Geron Sp.	8
2019-05-03	A	13:30:00	14:00:00	4	2	86	8	Helina coniformis	2
2019-05-03	A	13:30:00	14:00:00	4	2	86	8	Synagris analis	2
2019-05-03	A	09:30:00	10:00:00	3	2	72	8	Unidentified	1
2019-05-03	A	13:30:00	14:00:00	4	2	86	8	Xylocopa nigrita	5
2019-05-04	B	09:00:00	09:30:00	1	2	71	5		0
2019-05-10	A	12:50:00	13:20:00	1	3	75	10	Unidentified	3
2019-05-10	A	12:50:00	13:20:00	1	3	75	10	Unidentified	1
2019-05-11	A	10:58:00	11:28:00	3	2	40	16		0
2019-05-11	A	11:40:00	12:10:00	2	4	62	11		0
2019-05-20	A	10:00:00	10:30:00	1	4	68	8	Apis mellifera	2
2019-05-20	A	12:00:00	12:30:00	3	2	68	8	Apis mellifera	2
2019-05-20	A	13:45:00	14:15:00	4	6	70	7	Apis mellifera	1
2019-05-20	A	10:00:00	10:30:00	1	4	68	8	Bombylius mollis	1
2019-05-20	A	13:45:00	14:15:00	4	6	70	7	Xylocopa flavorufa	4
2019-05-20	A	10:00:00	10:30:00	1	4	68	8	Unidentified	3
2019-05-20	A	12:00:00	12:30:00	3	2	68	8	Unidentified	5
2019-05-20	A	12:00:00	12:30:00	3	2	68	8	Unidentified	1
2019-05-20	A	12:00:00	12:30:00	3	2	68	8	Unidentified	1
2019-05-20	A	15:00:00	15:30:00	2	4	69	8		0
2019-05-20	A	16:00:00	16:30:00	5	4	70	8		0
2019-05-22	A	10:05:00	10:35:00	1	4	76	8		0
2019-05-22	A	11:30:00	12:00:00	3	2	73	11		0
2019-05-22	A	13:15:00	13:45:00	4	6	70	9		0
2019-05-25	A	13:30:00	14:00:00	4	6	81	8	Anthophora conspicua	1
2019-05-25	A	11:45:00	12:15:00	3	2	80	7	Xylocopa flavorufa	1
2019-05-25	A	10:30:00	11:00:00	1	4	79	8		0
2019-05-25	A	13:30:00	14:00:00	4	6	81	8	Unidentified	1
2019-05-25	A	15:00:00	15:30:00	2	3	81	11		0
2019-06-19	A	10:45:00	11:15:00	1	4	66	8	Anthophora conspicua	4
2019-06-19	A	10:45:00	11:15:00	1	4	66	8	Apis mellifera	1
2019-06-19	A	14:35:00	15:05:00	2	5	60	8	Bombylius mollis	3
2019-06-19	A	14:00:00	14:30:00	3	4	63	10	Dichaetomyia pilifemur	3
2019-06-19	A	14:00:00	14:30:00	3	4	63	10	Lucilia cuprina	1
2019-06-19	A	14:35:00	15:05:00	2	5	60	8	Phytomia incisa	7
2019-06-19	A	14:00:00	14:30:00	3	4	63	10	Xylocopa flavorufa	2
2019-06-19	A	11:45:00	12:15:00	4	3	66	9		0
2019-06-19	A	12:45:00	13:15:00	5	4	64	10		0
2019-06-20	A	14:00:00	14:30:00	5	9	46	9	Butterfly	2
2019-06-20	A	09:30:00	10:00:00	1	2	45	8	Apis mellifera	1
2019-06-20	A	14:00:00	14:30:00	5	9	46	9	Apis mellifera	1
2019-06-20	A	09:30:00	10:00:00	1	2	45	8	Bombylius mollis	4
2019-06-20	A	09:30:00	10:00:00	1	2	45	8	Chrysomya regalis	3
2019-06-20	A	16:00:00	16:30:00	3	7	66	11	Xylocopa flavorufa	2
2019-06-20	A	09:30:00	10:00:00	1	2	45	8	Xylocopa nigrita	2
2019-06-20	A	12:30:00	13:00:00	4	6	40	9	Xylocopa nigrita	1
2019-06-20	A	10:30:00	11:00:00	2	3	45	9		0
2019-06-20	A	11:30:00	12:00:00	3	5	40	9		0
2019-06-20	A	15:00:00	15:30:00	2	3	65	10		0
2019-06-21	A	10:15:00	10:45:00	1	6	66	9	Anthophora conspicua	4
2019-06-21	A	10:15:00	10:45:00	1	6	66	9	Anthophora torrida	2
2019-06-21	A	12:15:00	12:45:00	3	2	60	9	Apotmetus vansomereni	2
2019-06-21	A	14:30:00	15:00:00	5	3	33	8	Phytomia bulligera	2
2019-06-21	A	12:15:00	12:45:00	3	2	60	9	Phytomia incisa	4
2019-06-21	A	14:30:00	15:00:00	5	3	33	8	Xylocopa flavorufa	4
2019-06-21	A	16:30:00	17:00:00	3	6	30	10	Xylocopa flavorufa	2
2019-06-21	A	11:15:00	11:45:00	2	3	66	9		0
2019-06-21	A	13:15:00	13:45:00	4	6	60	9		0
2019-06-21	A	15:30:00	16:00:00	1	4	35	10		0
2019-07-13	A	15:30:00	16:00:00	3	5	45	13	Anthophora conspicua	3
2019-07-13	A	13:00:00	13:30:00	4	2	50	13	Apis mellifera	1
2019-07-13	A	15:30:00	16:00:00	3	5	45	13	Apis mellifera	1
2019-07-13	A	10:00:00	10:30:00	1	3	53	13	Cathimeris sp.	1
2019-07-13	A	10:00:00	10:30:00	1	3	53	13	Megachile cincta	3
2019-07-13	A	11:00:00	11:30:00	2	5	50	15	Megachile sp.	2
2019-07-13	A	10:00:00	10:30:00	1	3	53	13	Xylocopa flavorufa	5
2019-07-13	A	14:30:00	15:00:00	5		49	15	Xylocopa flavorufa	1
2019-07-13	A	15:30:00	16:00:00	3	5	45	13	Xylocopa flavorufa	1
2019-07-13	A	15:30:00	16:00:00	3	5	45	13	Xylocopa hottentotta	1
2019-07-13	A	11:00:00	11:30:00	2	5	50	15	Xylocopa modesta	1
2019-07-13	A	11:00:00	11:30:00	2	5	50	15	Xylocopa sp.	1
2019-07-13	A	12:00:00	12:30:00	3	4	49	14		0
2019-07-14	A	11:00:00	11:30:00	1	3	51	17	Anthophora cornuta	1
2019-07-14	A	12:30:00	13:00:00	2	4	53	16	Apotmetus vansomereni	1
2019-07-14	A	16:00:00	16:30:00	4	2	52	14	Apotmetus vansomereni	3
2019-07-14	A	12:30:00	13:00:00	2	4	53	16	Bombylius mollis	3
2019-07-14	A	14:00:00	14:30:00	5	2	43	10	Philoliche sagittaria	1
2019-07-14	A	11:00:00	11:30:00	1	3	51	17	Phytomia bulligera	3
2019-07-14	A	12:30:00	13:00:00	2	4	53	16	Phytomia incisa	2
2019-07-14	A	14:00:00	14:30:00	5	2	43	10	Phytomia incisa	4
2019-07-14	A	16:00:00	16:30:00	4	2	52	14	Xylocopa flavorufa	1
2019-07-14	A	14:00:00	14:30:00	5	2	43	10	Xylocopa sp.	1
2019-07-14	A	09:30:00	10:00:00	3	2	50	13		0
2019-07-14	A	15:00:00	15:30:00	4	4	49	12		0
2019-07-15	A	10:00:00	10:30:00	5	3	51	14	Belonogaster juncea	1
2019-07-15	A	12:00:00	12:30:00	2	4	50	13	Lucilia cuprina	4
2019-07-15	A	12:00:00	12:30:00	2	4	50	13	Unidentified	2
2019-07-15	A	12:00:00	12:30:00	2	4	50	13	Xylocopa nigrita	2
2019-07-15	A	16:00:00	16:30:00	3	5	50	12	Xylocopa nigrita	1
2019-07-15	A	11:00:00	11:30:00	1	2	49	18		0
2019-07-15	A	14:00:00	14:30:00	3	2	47	16		0
2019-07-15	A	15:00:00	15:30:00	4	2	47	15		0
2019-07-29	A	10:30:00	11:00:00	2	4	46	12	Anthophora acraensis	2
2019-07-29	A	13:30:00	14:00:00	4	2	48	11	Apis mellifera	2
2019-07-29	A	14:30:00	15:00:00	5	3	50	12	Apis mellifera	1
2019-07-29	A	13:30:00	14:00:00	4	2	48	11	Bombylius mollis	1
2019-07-29	A	14:30:00	15:00:00	5	3	50	12	Cathimeris sp.	1
2019-07-29	A	13:30:00	14:00:00	4	2	48	11	Ceratina sp.	2
2019-07-29	A	13:30:00	14:00:00	4	2	48	11	Megachile basalis	3
2019-07-29	A	14:30:00	15:00:00	5	3	50	12	Megachile basalis	1
2019-07-29	A	14:30:00	15:00:00	5	3	50	12	Xylocopa nigrita	1
2019-07-29	A	10:30:00	11:00:00	2	4	46	12	Xylocopa sp.	1
2019-07-29	A	09:30:00	10:00:00	1	3	52	10		0
2019-07-29	A	11:30:00	12:00:00	3	2	46	13		0
2019-07-29	A	15:30:00	16:00:00	2	2	47	13		0
2019-07-31	A	11:30:00	12:00:00	2	2	48	18	Apis mellifera	1
2019-07-31	A	12:30:00	13:00:00	3	2	48	14	Dichaetomyia pilifemur	1
2019-07-31	A	12:30:00	13:00:00	3	2	48	14	Megachile sp.	2
2019-07-31	A	12:30:00	13:00:00	3	2	48	14	Xylocopa flavorufa	3
2019-07-31	A	10:30:00	11:00:00	1	2	49	15		0
2019-07-31	A	14:00:00	14:30:00	4	5	49	17		0
2019-07-31	A	15:45:00	16:15:00	5	3	47	20		0
2019-08-01	A	11:30:00	12:00:00	3	5	48	19	Butterfly	1
2019-08-01	A	15:30:00	16:00:00	1	3	49	21	Anthophora torrida	1
2019-08-01	A	14:30:00	15:00:00	5	3	52	21	Ceratina sp.	3
2019-08-01	A	10:30:00	11:00:00	2	4	40	19	Geron sp.	2
2019-08-01	A	14:30:00	15:00:00	5	3	52	21	Megachile felina	1
2019-08-01	A	10:30:00	11:00:00	2	4	40	19	Synagris analis	2
2019-08-01	A	14:30:00	15:00:00	5	3	52	21	Xylocopa modesta	2
2019-08-01	A	15:30:00	16:00:00	1	3	49	21	Xylocopa modesta	3
2019-08-01	A	10:30:00	11:00:00	2	4	40	19	Xylocopa nigrita	3
2019-08-01	A	11:30:00	12:00:00	3	5	48	19	Xylocopa nigrita	1
2019-08-01	A	15:30:00	16:00:00	1	3	49	21	Xylocopa nigrita	1
2019-08-01	A	09:30:00	10:00:00	1	4	46	18		0
2019-08-01	A	12:30:00	13:00:00	4	2	49	21		0
2019-08-02	A	10:15:00	10:45:00	4	3	48	15	Apis mellifera	1
2019-08-02	A	14:30:00	15:00:00	2	4	47	18	Bombylius mollis	2
2019-08-02	A	14:30:00	15:00:00	2	4	47	18	Cathimeris sp.	1
2019-08-02	A	10:15:00	10:45:00	4	3	48	15	Lucilia cuprina	4
2019-08-02	A	11:30:00	12:00:00	1	2	45	17		0
2019-08-02	A	12:30:00	13:00:00	3	4	47	18		0
2019-08-02	A	15:30:00	16:00:00	5	3	45	25		0
