# Supplementary material for: Flower visitors of Streptocarpus teitensis: implications for conservation of a critically endangered African violet species in Kenya
Source: PeerJ. 2021 Jan 26;9:e10473. doi: 10.7717/peerj.10473 (PMC7845525; doi:10.7717/peerj.10473)
Supplement: Supplemental Information 8 — Fruit set of S. teitensis under self and open pollination on five plant pairs selected along 100 m line transects in sites A and B between April and August 2019. [file peerj-09-10473-s008.xlsx]

## Sheet: Appendix 4___African_violets__f
Bagged plants						Open pollinated plants
Site	Bagged plant no.	# bagged flowers	Bagged _Number of fruits	%Fruit set		Control plant no.	# bagged flowers	Open_Number of fruits	%Fruit set		IP insect pollination
A	1	15	1	6.67		1	22	15	68.18		14
A	2	20	3	15		2	16	8	50		5
A	3	19	7	36.84		3	17	16	94.12		9
A	4	23	11	47.83		4	20	12	60		1
A	5	18	10	55.56		5	19	11	57.89		1
											0
B	1	17	2	11.76		1	18	5	27.78		3
B	2	21	3	14.29		1	17	4	23.53		1
	Grand total	133	37			Grand total	129	10.1429	54.5
	Mean		5.28571	26.85				1.76512	9.11824
	SE		1.52307	7.39585
	Fruit to Flower ratio	3.59					1.82
